# Supplementary material
Source: Research Square preprint supplement (doi:10.21203/rs.3.rs-9316716/v1)
Supplement: Supplementary file 1 [file 1acc3df43fe14e572aed4b3e.docx]

| **Supplementary Table 1. Fully adjusted associations of baseline factors with initiation of social participation (n = 308)** | | |
| --- | --- | --- |
| Characteristic | RR (95% CI) | p-value |
| Neighborhood interaction |  |  |
| Sometimes vs None | 1.29 (1.06, 1.58) | 0.01 |
| Often vs None | 1.33 (1.05, 1.68) | 0.02 |
| Sex |  |  |
| Female vs Male | 1.09 (0.87, 1.37) | 0.45 |
| Body mass index category, kg/m² |  |  |
| <18.5 vs 18.5–22.9 | 0.70 (0.41, 1.20) | 0.19 |
| ≥23 vs 18.5–22.9 | 1.01 (0.86, 1.18) | 0.92 |
| Smoking status |  |  |
| Former vs Never | 0.98 (0.77, 1.23) | 0.83 |
| Current vs Never | 1.16 (0.92, 1.47) | 0.20 |
| Drinking status |  |  |
| Current vs Never/Past | 1.16 (0.96, 1.40) | 0.13 |
| Educational attainment |  |  |
| Lower than high school vs High school or above | 0.84 (0.70, 1.01) | 0.07 |
| Marital status |  |  |
| Other vs Married | 1.08 (0.82, 1.43) | 0.56 |
| Living arrangement |  |  |
| With family vs Alone | 1.38 (0.75, 2.54) | 0.3 |
| Work status |  |  |
| Working vs Not working | 1.02 (0.86, 1.20) | 0.84 |
| Walking time |  |  |
| ≥1 h/day vs <1 h/day | 1.01 (0.86, 1.18) | 0.91 |
| Exercise frequency |  |  |
| ≥2/week vs <2/week | 0.92 (0.74, 1.13) | 0.42 |
| Competence in daily living |  |  |
| Lower competence vs High competence | 0.84 (0.66, 1.06) | 0.13 |
| Depressive symptoms |  |  |
| Presence vs Absence | 0.85 (0.70, 1.04) | 0.11 |
| Hypertension |  |  |
| Presence vs Absence | 0.96 (0.83, 1.11) | 0.58 |
| Diabetes mellitus |  |  |
| Presence vs Absence | 1.07 (0.86, 1.32) | 0.55 |
| Cardiovascular disease |  |  |
| Presence vs Absence | 0.83 (0.62, 1.09) | 0.18 |
| Relative risks (RRs) and 95% confidence intervals (CIs) were estimated using modified Poisson regression with robust standard errors after multiple imputation.  Fully adjusted models included sex, entry year, body mass index category, smoking status, drinking status, educational attainment, marital status, living arrangement, work status, walking time, exercise frequency, neighborhood interaction, competence in daily living, depressive symptoms, hypertension, diabetes mellitus, and cardiovascular disease. | | |

| **Supplementary Table 2. Fully adjusted associations of baseline factors with cessation of social participation (n = 1,380)** | | |
| --- | --- | --- |
| Characteristic | RR (95% CI) | p-value |
| Neighborhood interaction |  |  |
| Sometimes vs None | 1.23 (0.58, 2.64) | 0.58 |
| Often vs None | 1.07 (0.48, 2.40) | 0.86 |
| Sex |  |  |
| Female vs Male | 0.65 (0.30, 1.38) | 0.26 |
| Body mass index category, kg/m² |  |  |
| <18.5 vs 18.5–22.9 | 1.68 (0.60, 4.71) | 0.32 |
| ≥23 vs 18.5–22.9 | 1.08 (0.66, 1.77) | 0.76 |
| Smoking status |  |  |
| Former vs Never | 1.16 (0.51, 2.64) | 0.71 |
| Current vs Never | 1.64 (0.70, 3.85) | 0.25 |
| Drinking status |  |  |
| Current vs Never/Past | 0.58 (0.34, 0.99) | 0.04 |
| Educational attainment |  |  |
| Lower than high school vs High school or above | 1.37 (0.81, 2.30) | 0.24 |
| Marital status |  |  |
| Other vs Married | 1.65 (0.70, 3.92) | 0.25 |
| Living arrangement |  |  |
| With family vs Alone | 1.34 (0.40, 4.51) | 0.63 |
| Work status |  |  |
| Working vs Not working | 1.12 (0.69, 1.82) | 0.64 |
| Walking time |  |  |
| ≥1 h/day vs <1 h/day | 1.18 (0.71, 1.96) | 0.51 |
| Exercise frequency |  |  |
| ≥2/week vs <2/week | 0.99 (0.49, 1.99) | 0.97 |
| Competence in daily living |  |  |
| Lower competence vs High competence | 1.41 (0.70, 2.83) | 0.34 |
| Depressive symptoms |  |  |
| Presence vs Absence | 2.82 (1.71, 4.66) | <0.001 |
| Hypertension |  |  |
| Presence vs Absence | 1.12 (0.69, 1.83) | 0.63 |
| Diabetes mellitus |  |  |
| Presence vs Absence | 0.78 (0.28, 2.15) | 0.62 |
| Cardiovascular disease |  |  |
| Presence vs Absence | 0.53 (0.13, 2.09) | 0.36 |
| Relative risks (RRs) and 95% confidence intervals (CIs) were estimated using modified Poisson regression with robust standard errors after multiple imputation.  Fully adjusted models included sex, entry year, body mass index category, smoking status, drinking status, educational attainment, marital status, living arrangement, work status, walking time, exercise frequency, neighborhood interaction, competence in daily living, depressive symptoms, hypertension, diabetes mellitus, and cardiovascular disease. | | |
